# Supplementary material
Source: PubMed Central journal article supplement (PMC534531)

# Z-sections

# Z-series projection

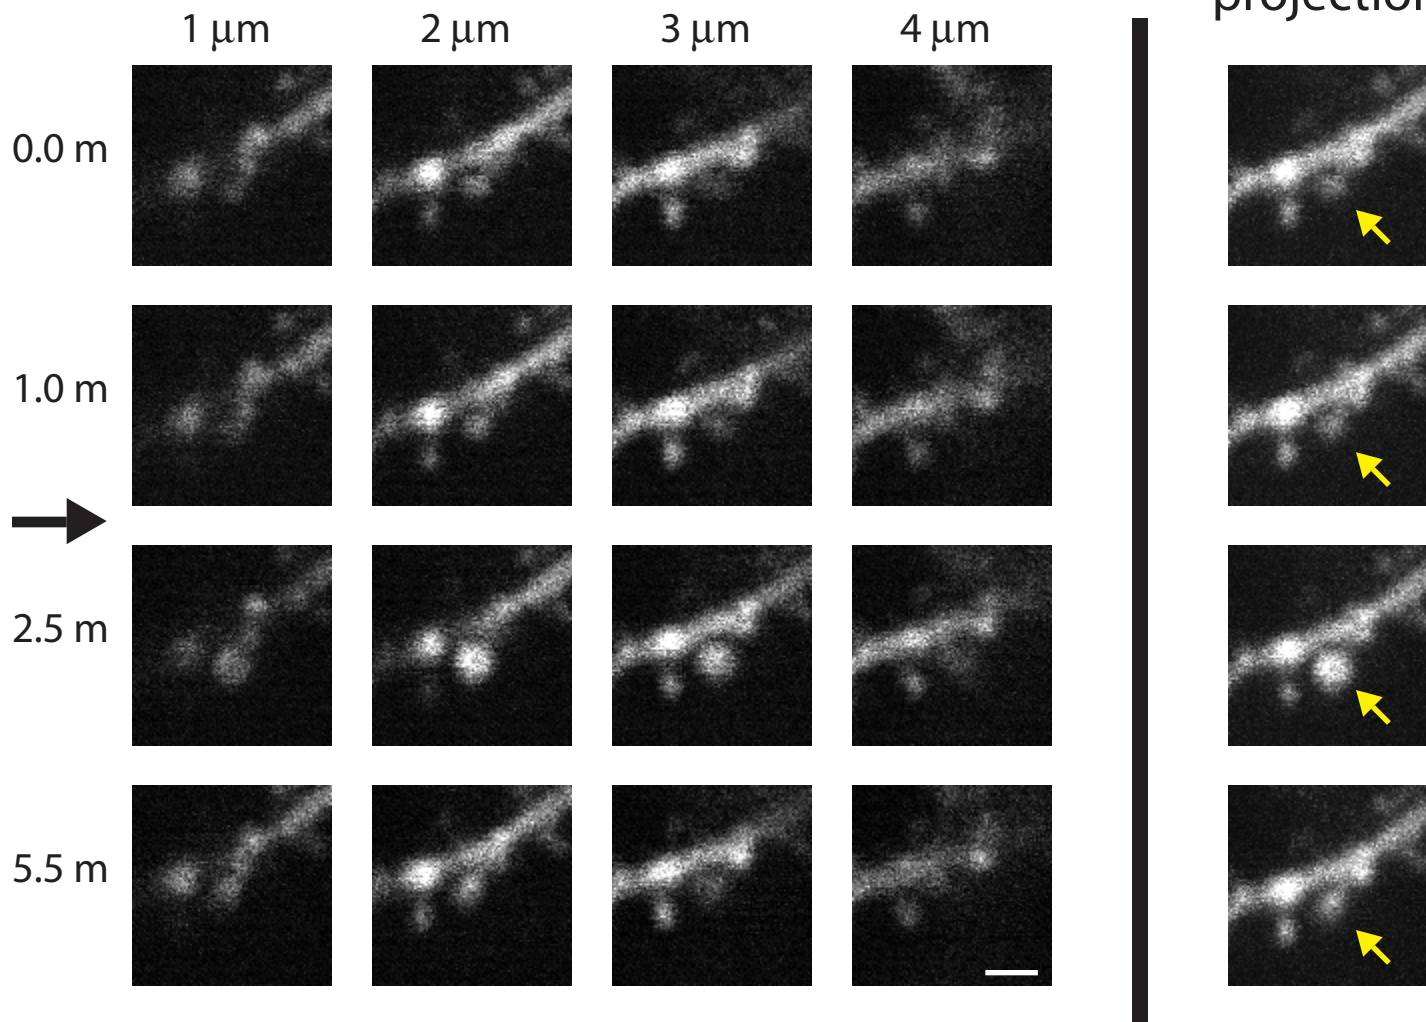

Supplement: pnas_101_47_16665__2.pdf [file pnas_101_47_16665__2.pdf]

**A**

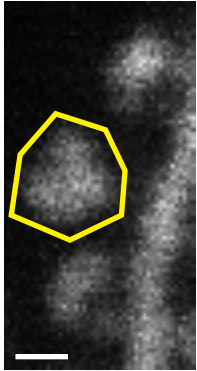

**B 0 m**

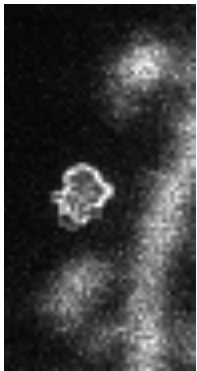

97 pixels

1 m

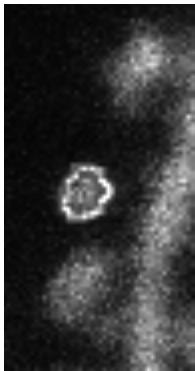

94 pixels

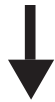

2 m

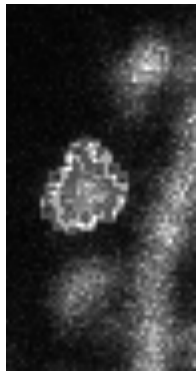

233 pixels

3 m

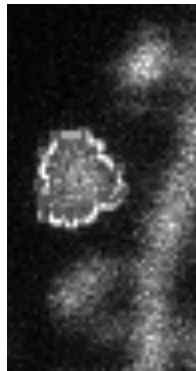

319 pixels

4 m

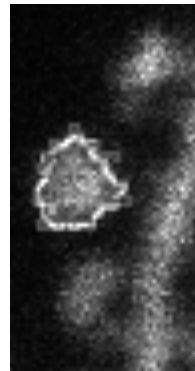

306 pixels

5 m

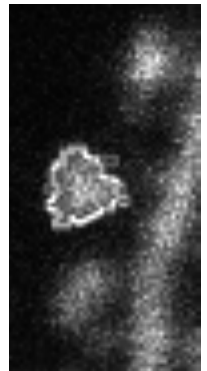

219 pixels

Supplement: pnas_101_47_16665__3.pdf [file pnas_101_47_16665__3.pdf]

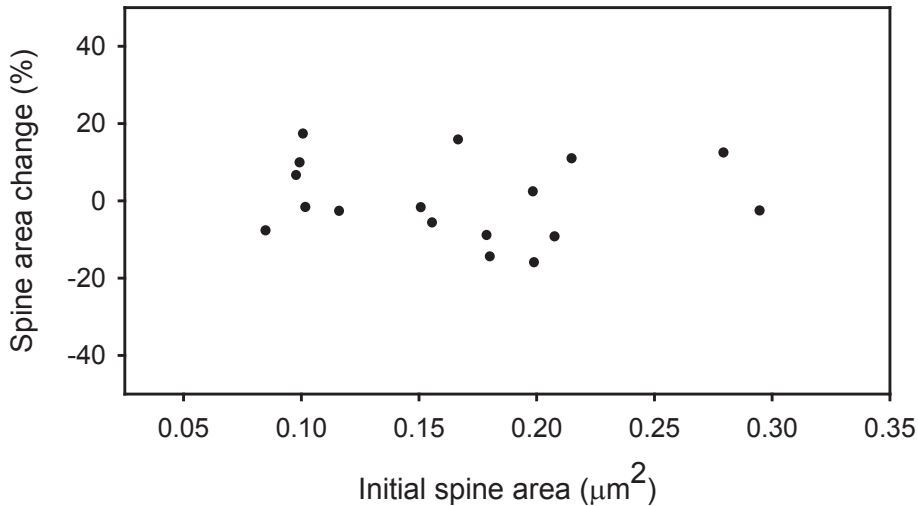

Supplement: pnas_101_47_16665__4.pdf [file pnas_101_47_16665__4.pdf]

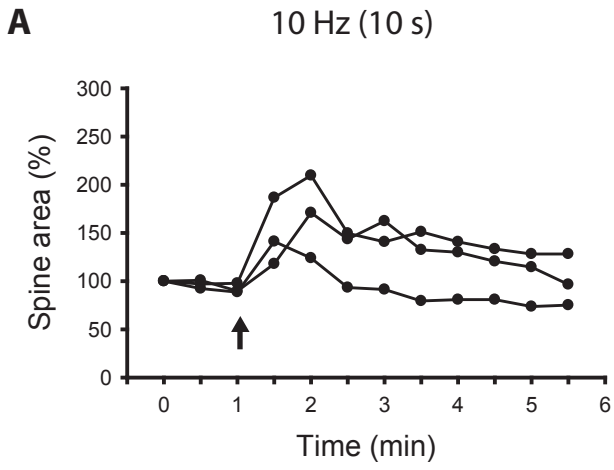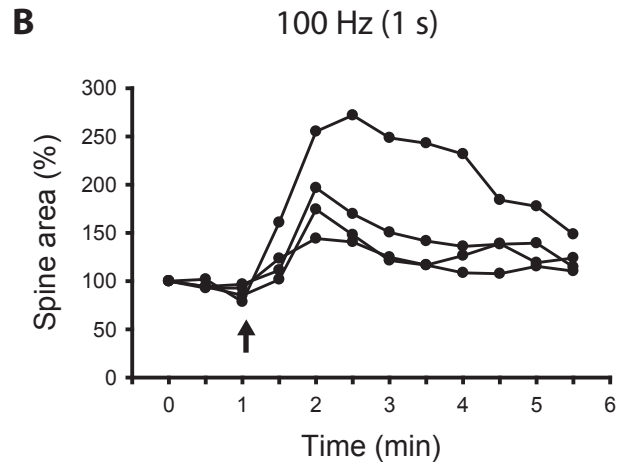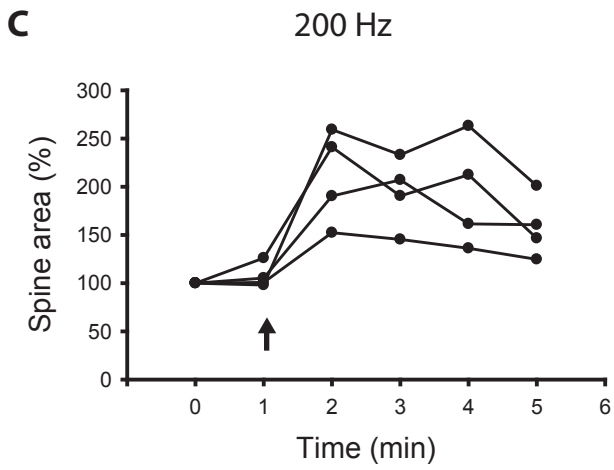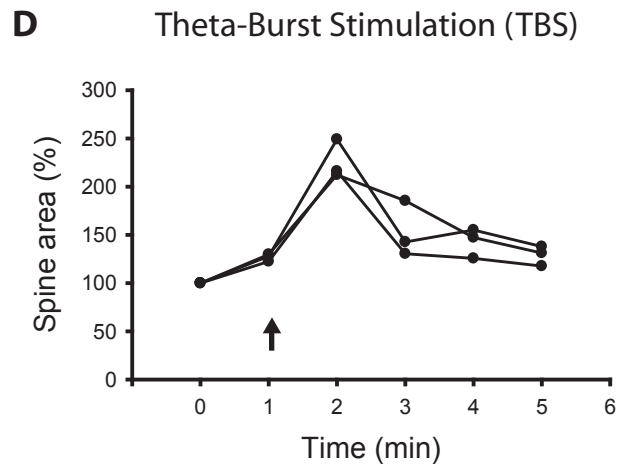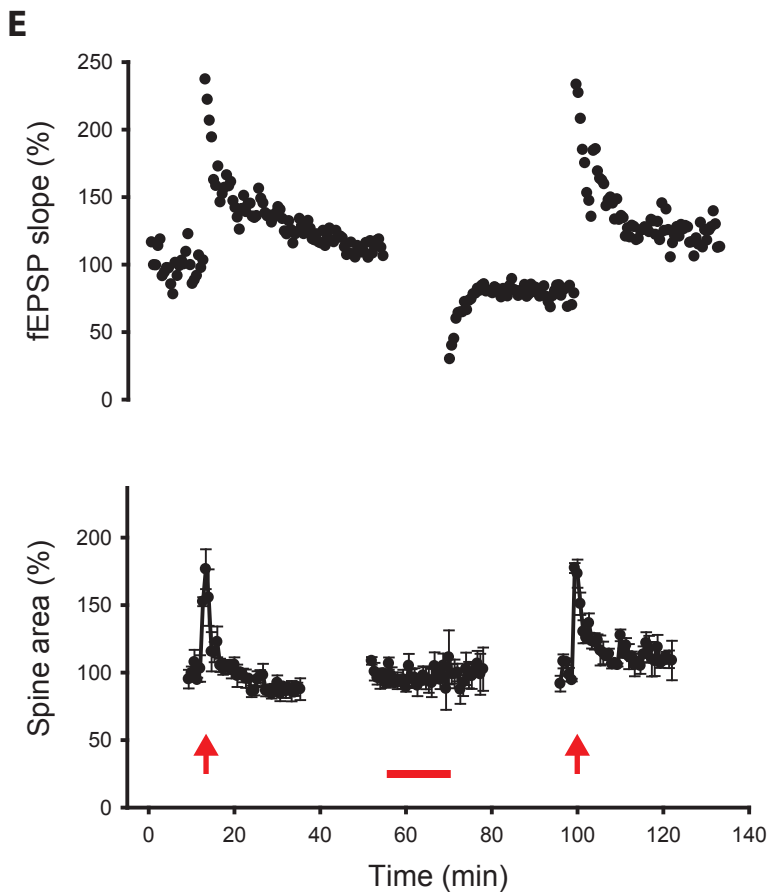

Supplement: pnas_101_47_16665__5.pdf [file pnas_101_47_16665__5.pdf]

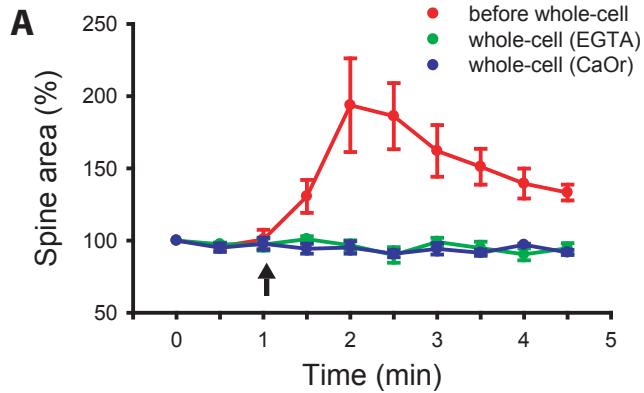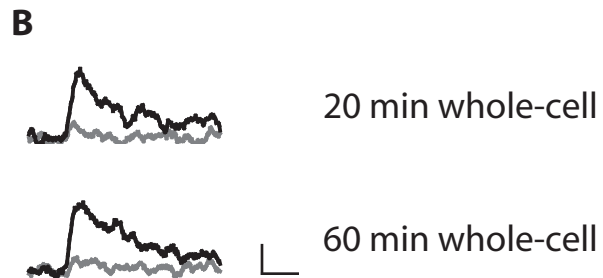

Supplement: pnas_101_47_16665__6.pdf [file pnas_101_47_16665__6.pdf]
